# Supplementary material for: Plastid Phylogenomic Analyses Reveal a Cryptic Species of Ligusticopsis (Apiaceae, Angiosperms)
Source: MDPI journal article supplement (doi:10.3390/ijms24087419), 2023-04-18
Supplement: s1 [file s1]

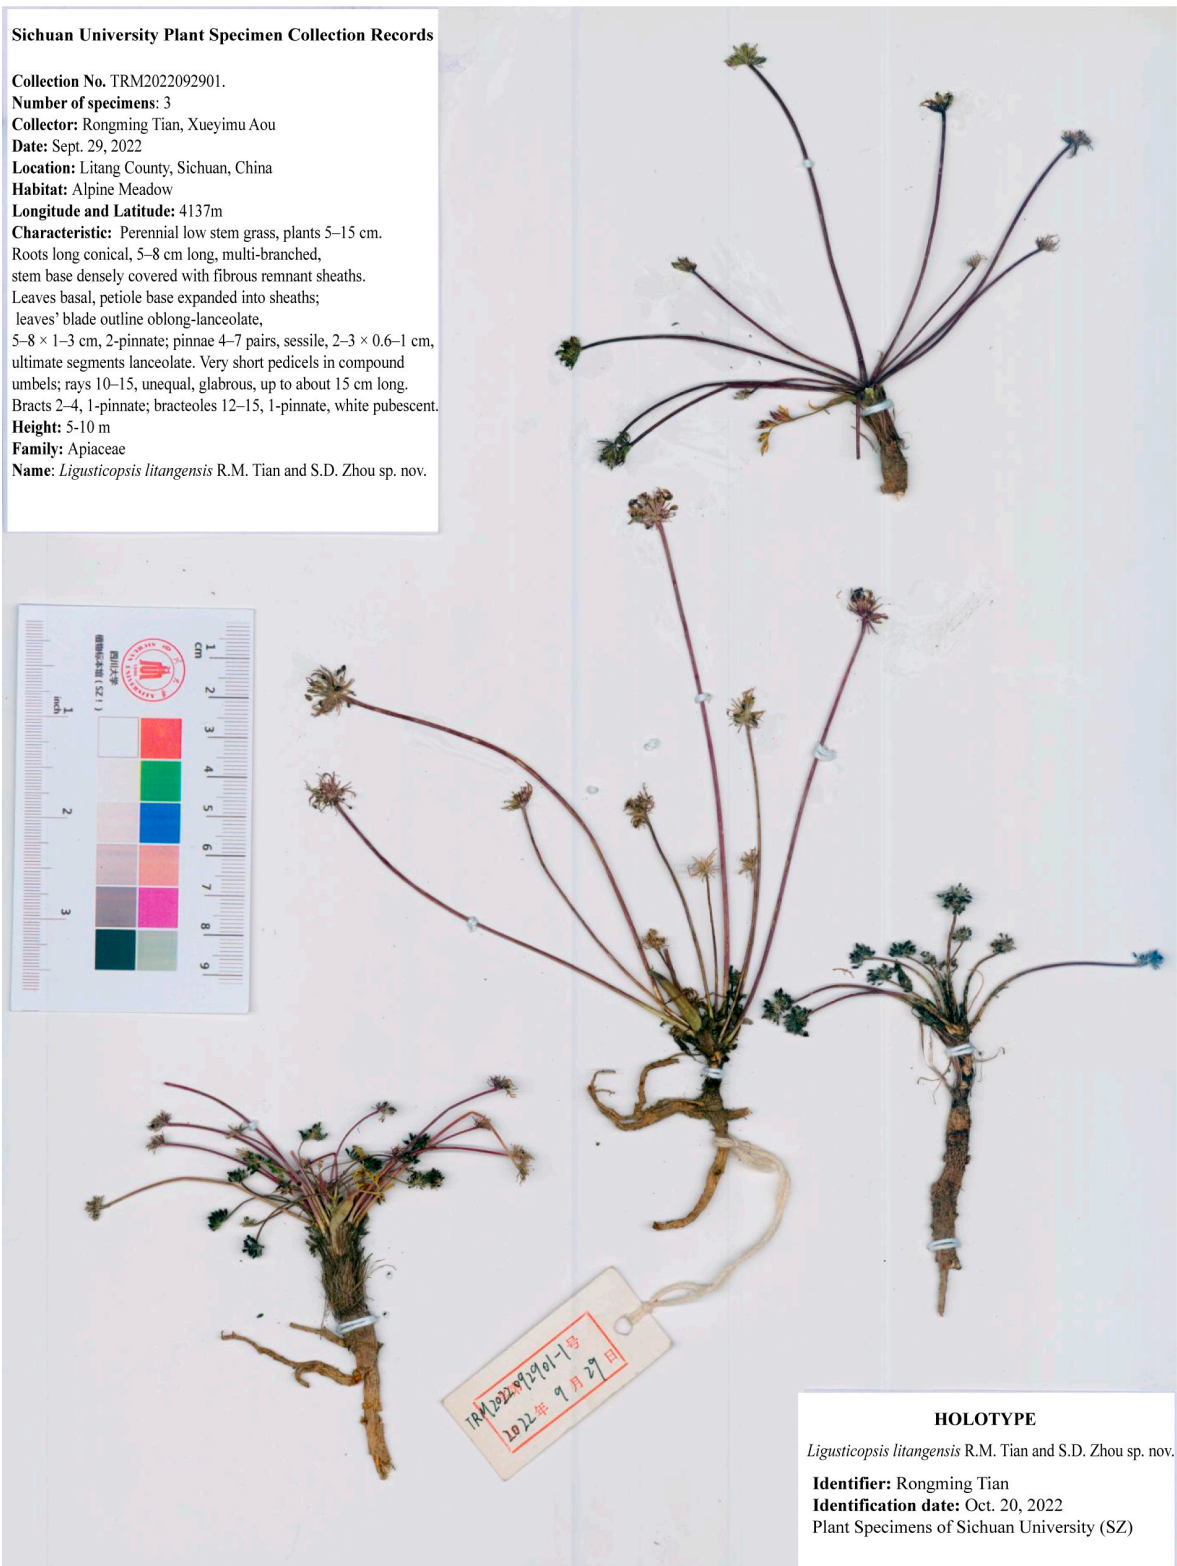

**Figure S1.** Holotype of *Ligusticopsis litangensis*. Table A4: Voucher details and GenBank accession numbers of taxa included in this study.
