# Supplementary material for: Plastid Phylogenomic Analyses Reveal a Cryptic Species of Ligusticopsis (Apiaceae, Angiosperms)
Source: Int J Mol Sci. 2023 Apr 18;24(8):7419. doi: 10.3390/ijms24087419 (PMC10138589; doi:10.3390/ijms24087419)
Supplement: Supplementary file 1 [file ijms-24-07419-s001.zip › Table S1.xlsx]

## Sheet: Sheet1
Table S1. Morphological comparison of Ligusticopsis litangensis and related species.
Characters	Ligusticopsis litangensis	Cortia depressa	Ligusticopsis capillacea	Ligusticopsis dielsiana	Ligusticopsis rechingerana
Height	5-10 cm	5-20 cm	6-15 cm	20-50 cm	20-80 cm
Stem (base)	covered with fibrous remains of petioles	covered with fibrous remains of petioles	covered with fibrous remains of petioles	covered with fibrous remains of petioles	covered with fibrous remains of petioles
Basal leaves	2-pinnate	2–3-pinnatisect	2-pinnate	3–4-pinnate	1–2-pinnate
Ultimate	lanceolate	linear	linear-lanceolate	linear	ovate
segments of
blade
Bracts	2-4, Pinnate, pilose	few, pinnate	1-2, pinnate, caducous	1-2, pinnate, caducous	2-6, pinnate, densely pilose
Bracteoles	12-15, Pinnate, pilose, longer than pedicels	10-15, 2-pinnatisec	6-8, pinnate, ciliate, longer than pedicels	8-10, Pinnate, longer than pedicels	pinnate, hispid throughout,
		longer than pedicels			longer than pedicels
Rays	10-15, unequal, elongated,10-15 cm	numerous, unequal, 3-6 cm	10-20, equal,	14-23,unequal,	15-30, equal, 3-4 cm
			1-2 cm	scabrid, 1.5 cm
Petals	white obcordate	white, midrib yellowish	white purplish obcordate	white or purplish abaxially,obovate	white purplish obcordate
Calyx teeth	linear-lanceolate	linear-lanceolate	lanceolate	subulate	acute
Fruit	oblong-globose	ovoid-oblong	Ovate	oblong	Elliptic to ovate
Ribs	lateral ribs winged	lateral ribs winged, dorsal ribs linear or slightly narrowly winged	lateral ribs winged, dorsal ribs filiform	lateral ribs winged, dorsal ribs raised	lateral ribs winged, dorsal ribs filiform
	dorsal ribs keeled
Vittae	vallecular vittae 1-2,commissural 3-4	vallecular vittae 1-2, commissural 2-4	vallecular vittae1-3, commissural 6	vallecular vittae 1-3, commissural 4-6	vallecular vittae 1-3, commissural 6
