# Supplementary material for: Plastid Phylogenomic Analyses Reveal a Cryptic Species of Ligusticopsis (Apiaceae, Angiosperms)
Source: Int J Mol Sci. 2023 Apr 18;24(8):7419. doi: 10.3390/ijms24087419 (PMC10138589; doi:10.3390/ijms24087419)
Supplement: Supplementary file 1 [file ijms-24-07419-s001.zip › Table S2.xlsx]

## Sheet: Sheet1
Table S2. Codon usage and relative synonymous codon usage (RSCU) values of protein coding genes for the tewlve plastomes
Amino acid	codon	Ligusticopsis rechingerana		Ligusticopsis capillacea		Ligusticopsis hispida		Ligusticopsis scapiformis		Ligusticopsis integrifolia		Ligusticopsis involucrata		Ligusticopsis wallichiana		Ligusticopsis oliveriana		Ligusticopsis modesta		Ligusticopsis brachyloba		Ligusticopsis dielsiana		Ligusticopsis litangensis
		RSCU value	number	RSCU value	number	RSCU value	number	RSCU value	number	RSCU value	number	RSCU value	number	RSCU value	number	RSCU value	number	RSCU value	number	RSCU value	number	RSCU value	number	RSCU value	number
Phe	UUU	1.35	805	1.32	737	1.34	860	1.32	738	1.32	737	1.32	732	1.34	823	1.32	735	1.35	804	1.35	802	1.32	737	1.36	807
	UUC	0.65	388	0.68	376	0.66	421	0.68	377	0.68	376	0.68	375	0.66	404	0.68	380	0.65	386	0.65	384	0.68	378	0.64	383
Leu	UUA	1.98	745	1.97	705	1.97	793	1.97	706	1.97	702	1.95	694	1.98	772	1.96	700	1.99	746	2	748	1.97	704	1.97	733
	UUG	1.19	446	1.19	426	1.16	468	1.19	427	1.2	427	1.2	428	1.17	455	1.2	430	1.19	446	1.18	443	1.18	422	1.19	444
	CUU	1.26	474	1.25	448	1.25	503	1.26	450	1.25	447	1.26	449	1.25	489	1.25	447	1.25	470	1.26	470	1.27	451	1.26	470
	CUC	0.39	146	0.4	142	0.42	168	0.39	139	0.4	143	0.4	142	0.4	157	0.4	144	0.39	148	0.39	146	0.4	144	0.4	147
	CUA	0.79	298	0.8	285	0.82	329	0.81	288	0.8	286	0.8	284	0.81	315	0.8	287	0.79	296	0.79	295	0.79	283	0.79	294
	CUG	0.38	144	0.38	136	0.39	158	0.38	135	0.38	136	0.38	136	0.38	150	0.39	138	0.39	145	0.38	144	0.38	135	0.39	144
Ile	AUU	1.44	871	1.45	814	1.43	928	1.45	814	1.45	814	1.44	809	1.44	902	1.44	815	1.45	873	1.44	866	1.44	816	1.44	867
	AUC	0.57	343	0.57	321	0.57	368	0.57	321	0.57	321	0.57	319	0.57	360	0.57	320	0.56	341	0.57	342	0.57	321	0.57	341
	AUA	0.99	601	0.98	551	1	649	0.98	553	0.98	553	0.99	559	0.99	618	0.99	560	0.99	597	0.99	599	0.99	559	0.99	593
Met	AUG	1	482	1	466	1	520	1	466	1	467	1	466	1	502	1	465	1	480	1	479	1	464	1	479
Val	GUU	1.51	443	1.51	430	1.5	468	1.52	431	1.51	429	1.52	428	1.51	458	1.51	431	1.51	442	1.52	444	1.51	429	1.5	436
	GUC	0.45	133	0.46	130	0.46	142	0.45	129	0.46	130	0.46	130	0.45	136	0.46	132	0.45	132	0.45	132	0.45	129	0.45	131
	GUA	1.45	425	1.47	418	1.46	455	1.46	414	1.46	415	1.45	410	1.46	442	1.44	411	1.46	425	1.44	421	1.45	412	1.45	422
	GUG	0.58	170	0.57	162	0.58	181	0.57	163	0.57	163	0.57	161	0.59	178	0.58	164	0.58	169	0.59	171	0.58	165	0.59	172
Ser	UCU	1.69	438	1.69	417	1.68	470	1.7	418	1.7	419	1.69	415	1.69	457	1.69	417	1.69	439	1.69	439	1.69	416	1.68	434
	UCC	0.97	253	0.99	243	0.98	274	0.98	241	0.98	242	0.99	244	0.98	266	0.99	244	0.96	250	0.97	253	0.99	245	0.97	251
	UCA	1.12	292	1.1	270	1.14	321	1.1	270	1.1	271	1.09	268	1.13	307	1.1	272	1.13	293	1.12	291	1.1	271	1.1	284
	UCG	0.65	169	0.65	160	0.65	181	0.65	161	0.65	160	0.64	158	0.64	174	0.65	160	0.65	168	0.65	170	0.66	162	0.65	168
Pro	CCU	1.6	355	1.62	342	1.59	377	1.61	339	1.62	340	1.62	339	1.59	366	1.63	342	1.59	355	1.6	355	1.63	342	1.61	357
	CCC	0.74	164	0.73	154	0.75	177	0.73	153	0.73	153	0.73	153	0.74	171	0.72	152	0.74	164	0.73	163	0.72	151	0.73	162
	CCA	1.05	234	1.01	212	1.05	250	1	211	1.01	213	1.01	212	1.06	245	1.01	212	1.06	236	1.05	234	1.01	212	1.04	231
	CCG	0.61	136	0.64	135	0.61	145	0.66	138	0.64	135	0.64	135	0.61	140	0.64	135	0.61	137	0.62	137	0.65	136	0.63	139
Thr	ACU	1.64	451	1.65	434	1.64	490	1.64	430	1.64	431	1.64	429	1.65	475	1.65	435	1.63	447	1.64	452	1.65	435	1.63	444
	ACC	0.71	195	0.71	188	0.71	212	0.72	190	0.72	190	0.71	186	0.71	204	0.72	189	0.73	199	0.7	194	0.72	189	0.71	194
	ACA	1.2	329	1.19	312	1.2	358	1.19	313	1.18	310	1.19	310	1.19	343	1.19	312	1.2	328	1.2	330	1.18	311	1.2	327
	ACG	0.45	125	0.45	119	0.45	136	0.45	117	0.45	118	0.46	119	0.45	130	0.44	117	0.45	123	0.46	126	0.45	120	0.46	125
Ala	GCU	1.79	522	1.79	515	1.78	549	1.79	515	1.79	515	1.79	515	1.78	540	1.79	516	1.79	520	1.79	521	1.79	517	1.79	522
	GCC	0.63	185	0.63	183	0.64	197	0.64	183	0.64	183	0.64	184	0.64	195	0.64	183	0.64	185	0.63	184	0.63	182	0.63	184
	GCA	1.1	322	1.1	318	1.12	344	1.11	318	1.1	316	1.1	317	1.12	340	1.09	315	1.1	321	1.11	323	1.1	317	1.1	322
	GCG	0.48	139	0.48	137	0.46	142	0.47	135	0.47	136	0.48	137	0.46	141	0.48	137	0.48	139	0.47	137	0.48	137	0.47	138
Tyr	UAU	1.59	651	1.59	604	1.59	703	1.59	604	1.59	603	1.59	610	1.59	673	1.6	608	1.59	650	1.59	647	1.59	605	1.59	645
	UAC	0.41	167	0.41	157	0.41	179	0.41	155	0.41	156	0.41	155	0.41	171	0.4	153	0.41	169	0.41	167	0.41	155	0.41	168
TER	UAA	1.7	34	1.75	35	1.73	37	1.75	35	1.75	35	1.75	35	1.71	36	1.7	34	1.7	34	1.7	34	1.75	35	1.7	34
	UAG	0.75	15	0.7	14	0.75	16	0.75	15	0.75	15	0.7	14	0.76	16	0.75	15	0.75	15	0.75	15	0.75	15	0.75	15
His	CAU	1.51	386	1.52	369	1.51	405	1.52	370	1.52	370	1.51	366	1.51	397	1.51	369	1.52	386	1.51	385	1.51	370	1.51	382
	CAC	0.49	124	0.48	117	0.49	131	0.48	118	0.48	117	0.49	120	0.49	128	0.49	121	0.48	122	0.49	125	0.49	119	0.49	124
Gln	CAA	1.51	573	1.48	528	1.51	604	1.48	528	1.49	531	1.49	531	1.51	593	1.49	531	1.51	574	1.51	570	1.49	531	1.52	573
	CAG	0.49	186	0.52	186	0.49	194	0.52	185	0.51	182	0.51	182	0.49	191	0.51	183	0.49	186	0.49	186	0.51	183	0.48	183
Asn	AAU	1.52	760	1.52	682	1.51	809	1.52	681	1.52	680	1.53	684	1.51	777	1.52	685	1.52	753	1.52	756	1.52	684	1.52	753
	AAC	0.48	237	0.48	216	0.49	261	0.48	215	0.48	216	0.47	213	0.49	250	0.48	214	0.48	240	0.48	241	0.48	215	0.48	239
Lys	AAA	1.52	841	1.52	716	1.52	912	1.52	718	1.52	718	1.51	721	1.52	868	1.52	726	1.52	841	1.52	841	1.51	718	1.53	842
	AAG	0.48	264	0.48	229	0.48	289	0.48	227	0.48	228	0.49	232	0.48	272	0.48	230	0.48	262	0.48	263	0.49	230	0.47	261
Asp	GAU	1.6	677	1.59	635	1.61	718	1.59	635	1.59	635	1.6	641	1.6	694	1.6	642	1.59	670	1.59	677	1.6	640	1.6	677
	GAC	0.4	171	0.41	163	0.39	176	0.41	163	0.41	163	0.4	160	0.4	174	0.4	160	0.41	174	0.41	172	0.4	161	0.4	171
Glu	GAA	1.5	828	1.48	767	1.51	893	1.48	766	1.48	766	1.48	767	1.5	847	1.48	768	1.5	824	1.5	826	1.48	768	1.5	824
	GAG	0.5	275	0.52	266	0.49	293	0.52	267	0.52	267	0.52	267	0.5	282	0.52	267	0.5	276	0.5	275	0.52	267	0.5	276
Cys	UGU	1.53	164	1.53	161	1.51	175	1.53	160	1.53	161	1.53	158	1.53	173	1.53	158	1.55	168	1.55	165	1.54	159	1.54	163
	UGC	0.47	50	0.47	50	0.49	57	0.47	49	0.47	49	0.47	48	0.47	53	0.47	49	0.45	49	0.45	48	0.46	48	0.46	49
TER	UGA	0.55	11	0.55	11	0.52	11	0.5	10	0.5	10	0.55	11	0.52	11	0.55	11	0.55	11	0.55	11	0.5	10	0.55	11
Trp	UGG	1	379	1	358	1	398	1	357	1	358	1	354	1	387	1	357	1	380	1	379	1	358	1	377
Arg	CGU	1.35	278	1.39	269	1.34	295	1.39	268	1.39	269	1.39	268	1.36	292	1.38	267	1.35	278	1.34	277	1.38	267	1.34	276
	CGC	0.4	82	0.42	81	0.4	88	0.41	80	0.41	79	0.42	82	0.38	82	0.43	83	0.39	80	0.4	82	0.42	81	0.4	83
	CGA	1.37	283	1.4	271	1.39	305	1.41	272	1.4	271	1.4	270	1.4	300	1.4	271	1.38	284	1.39	287	1.41	272	1.38	284
	CGG	0.47	96	0.49	94	0.46	101	0.48	93	0.48	93	0.48	93	0.46	99	0.48	93	0.46	95	0.47	97	0.48	93	0.46	95
Ser	AGU	1.22	317	1.23	304	1.19	333	1.23	303	1.22	301	1.24	305	1.19	322	1.23	303	1.22	316	1.22	317	1.23	303	1.23	318
	AGC	0.35	90	0.34	85	0.37	104	0.35	85	0.35	85	0.34	83	0.37	101	0.35	86	0.35	92	0.36	93	0.34	84	0.35	91
Arg	AGA	1.78	367	1.67	324	1.8	396	1.69	327	1.68	325	1.69	327	1.79	382	1.7	329	1.79	368	1.79	368	1.69	325	1.79	369
	AGG	0.63	129	0.64	123	0.61	135	0.63	121	0.63	121	0.63	121	0.6	129	0.62	121	0.63	129	0.61	125	0.62	119	0.62	128
Gly	GGU	1.35	500	1.34	486	1.33	521	1.34	486	1.34	486	1.34	486	1.33	512	1.34	485	1.34	497	1.34	496	1.34	484	1.34	496
	GGC	0.46	170	0.46	167	0.45	176	0.46	167	0.46	167	0.46	166	0.45	173	0.46	166	0.46	171	0.46	170	0.46	166	0.47	172
	GGA	1.5	555	1.5	545	1.54	605	1.5	543	1.5	544	1.5	543	1.53	589	1.5	546	1.5	556	1.51	557	1.5	543	1.5	553
	GGG	0.69	254	0.69	251	0.68	268	0.7	253	0.7	253	0.7	253	0.68	263	0.7	255	0.69	255	0.69	254	0.71	256	0.69	255
