# Supplementary material for: Plastid Phylogenomic Analyses Reveal a Cryptic Species of Ligusticopsis (Apiaceae, Angiosperms)
Source: Int J Mol Sci. 2023 Apr 18;24(8):7419. doi: 10.3390/ijms24087419 (PMC10138589; doi:10.3390/ijms24087419)
Supplement: Supplementary file 1 [file ijms-24-07419-s001.zip › Table S3.xlsx]

## Sheet: Sheet1
Table S3. Numbers of SSR motifs identified in the tewlve plastomes
species	mono-	di-	tri-	tetra-	penta-	hexa-
Ligusticopsis litangensis	43	19	3	9	3	1
Ligusticopsis brachyloba	39	19	2	10	1
Ligusticopsis modesta	36	19	3	10	2	2
Ligusticopsis dielsiana	41	21	1	9	3	1
Ligusticopsis capillacea	42	20	2	9	2	2
Ligusticopsis scapiformis	43	24	3	10	2
Ligusticopsis rechingerana	43	23	2	11	3	2
Ligusticopsis hispida	36	18	2	9	2	1
Ligusticopsis integrifolia	43	19	3	11	2	1
Ligusticopsis involucrata	39	19	2	10	1
Ligusticopsis wallichiana	41	19	3	8	2
Ligusticopsis oliveriana	45	20	3	10	2	1
