# Supplementary material for: Plastid Phylogenomic Analyses Reveal a Cryptic Species of Ligusticopsis (Apiaceae, Angiosperms)
Source: Int J Mol Sci. 2023 Apr 18;24(8):7419. doi: 10.3390/ijms24087419 (PMC10138589; doi:10.3390/ijms24087419)
Supplement: Supplementary file 1 [file ijms-24-07419-s001.zip › Table S4.xlsx]

## Sheet: Sheet1
Table S4. Voucher details and GenBank accession numbers of taxa involved in this study. Newly sequenced plastomes and ITS are in bold. “-” indicates that the information cannot be obtained.
Taxon	Sequence type	vouchers	GenBank number
Acronema schneideri	ITS	ZJ810826 (KUN)	EU236156
	plastome	—	NC_064352
Angelica apaensis	ITS	I_HEXJ0051	HQ686375
	plastome	HLQA10019	MT921966
Angelica dahurica	ITS	ADA-JS	MH188430
	plastome	JQP18091901(SZ)	OM281942
Angelica decursiva	ITS	Hexj1116	MH807951
	plastome	HLQA10016	MT921964
Angelica gigas	ITS	SZ744110 (SZ)	GU395156
	plastome	HLQA10054	MT921985
Angelica laxifoliata	ITS	2B	FJ196890
	plastome	HLQA10031	MT921969
Angelica nitida	ITS	Hexj1126	JN704862
	plastome	—	MF594405
Bupleurum krylovianum	ITS	ZJ0726 (KUN)	FJ385035
Bupleurum chinense	plastome	—	MT075713
Bupleurum rockii	ITS	J059 (KUN)	FJ385036
	plastome	1782301	NC_058631
Chamaesium delavayi	ITS	HQ1	KY744251
	plastome	—	MN119367
Chamaesium jiulongense	ITS	JLS2 (SZ)	KY744257
	plastome	—	MN119368
Chamaesium paradoxum	ITS	—	DQ782335
	plastome	—	MK780227
Changium smyrnioides	ITS	—	DQ517340
	plastome	—	NC_053938
Chuanminshen violaceum	ITS	J105(KUN)	FJ385040
	plastome	—	KU921430
Cortia depressa	ITS	E00059552	AF008607 AF009086
Cortiella cortioides	ITS	Qingzangdui2719 (KUN)	MK036638
Cortiella hookeri	ITS	djj2021080901 (SZ)	OM791606
Cortiella yatungense	ITS	djj2021092001–1 (SZ)	OM791608
Hansenia forrestii	ITS	j7(SZ)	MT337431
	plastome	—	MT834935
Hansenia oviformis	ITS	F22	MT337430
	plastome	—	MT843762
Hymenidium apiolens	ITS	G18092503-10(SZ)	MK078057
	plastome	—	MT609922
Hymenidium pilosum	ITS	G18092004-4 (SZ)	MK078058
	plastome	—	NC_060757
Ledebouriella seseloides	ITS	ls–02 (SNU)	KX757775
	plastome	—	NC_034643
Ligusticopsis brachyloba	ITS	L0814(SZ)	MZ497218
	plastome	L081401(SZ)	MZ491174
Ligusticopsis capillacea	ITS	XB	MT974023 MT974024
	plastome	RT2019100601(SZ)	NC_049051 MT409612
Ligusticopsis dielsiana	ITS	Z15194(KUN)	MK036591
	plastome	YBCS(SZ)	NC_063845
Ligusticopsis hispida	ITS	M2(SZ)	MT974019
	plastome	RT2019100201(SZ)	NC_049053
Ligusticopsis integrifolia	ITS	MM2 (SZ)	MT974022
	plastome	—	MT409616
Ligusticopsis involucrata	ITS	DB15(SZ)	MT974015
	plastome	—	MT409615
Ligusticopsis litangensis	ITS	TRM2022092901-1	OP902933
	ITS	TRM2022092901-2	OP902934
	ITS	TRM2022092901-3	OP902935
	plastome	TRM2022092901-1	OP899836
	plastome	TRM2022092901-2	OP899837
	plastome	TRM2022092901-3	OP899838
Ligusticopsis modesta	ITS	L08190301(SZ)	OL600822
	plastome	L081903(SZ)	OL547615
Ligusticopsis oliveriana	ITS	TRM2022080901	OP882296
	plastome	MBBL(SZ)	NC_063843
Ligusticopsis rechingerana	ITS	L081103(SZ)	MZ497220
	plastome	L081103(SZ)	MZ491175
Ligusticopsis scapiformis	ITS	CT9	MT974012
	plastome	RT2019082001(SZ)	NC_049057
Ligusticopsis wallichiana	ITS	LD08150601	OL600823
	plastome	LD081506	OL547616
Ligusticum jeholense	ITS	LGB1	KJ999440
	plastome	LHB(SZ)	MZ532567
Ligusticum sinense	ITS	KUN0463214(KUN)	MG745200
	plastome	—	MZ636542
Ligusticum tenuissimum	ITS	JKTM-1-000065	KP058314
	plastome	13I-08	NC_029394
Meeboldia delavayi	ITS	Y6 (SZ)	MN688992
	plastome	—	NC_054296
Meeboldia microloba	ITS	Y2(SZ)	MN688994
	plastome	—	NC_054297
Peucedanum wulongense	ITS	LZ20090935 (KUN)	KF806569
Peucedanum praeruptorum	ITS	ZXM001 (SZ)	EU418383
	plastome	—	NC_060841
Peucedanum japonicum	ITS	20150547	MF063830
	plastome	—	NC_034644
Peucedanum ampliatum	ITS	L2021006 (SZ)	ON974235
	plastome	—	NC_062055
Saposhnikovia divaricata	ITS	I930	KR232579
	plastome	—	MT561030
